December 2011

# PSYCHIATRIC SERVICES

A Journal of the  
American Psychiatric  
Association

- ◆ Focus on Youths:  
Seven Reports on  
Needs and Services
- ◆ Recovery in Practice:  
A Look at Guidelines  
From Six Countries
- ◆ Thinking Styles and  
Emotional States of  
U.S. Prison Inmates
- ◆ Reducing Stigma:  
In Our Own Voice-  
Family Companion

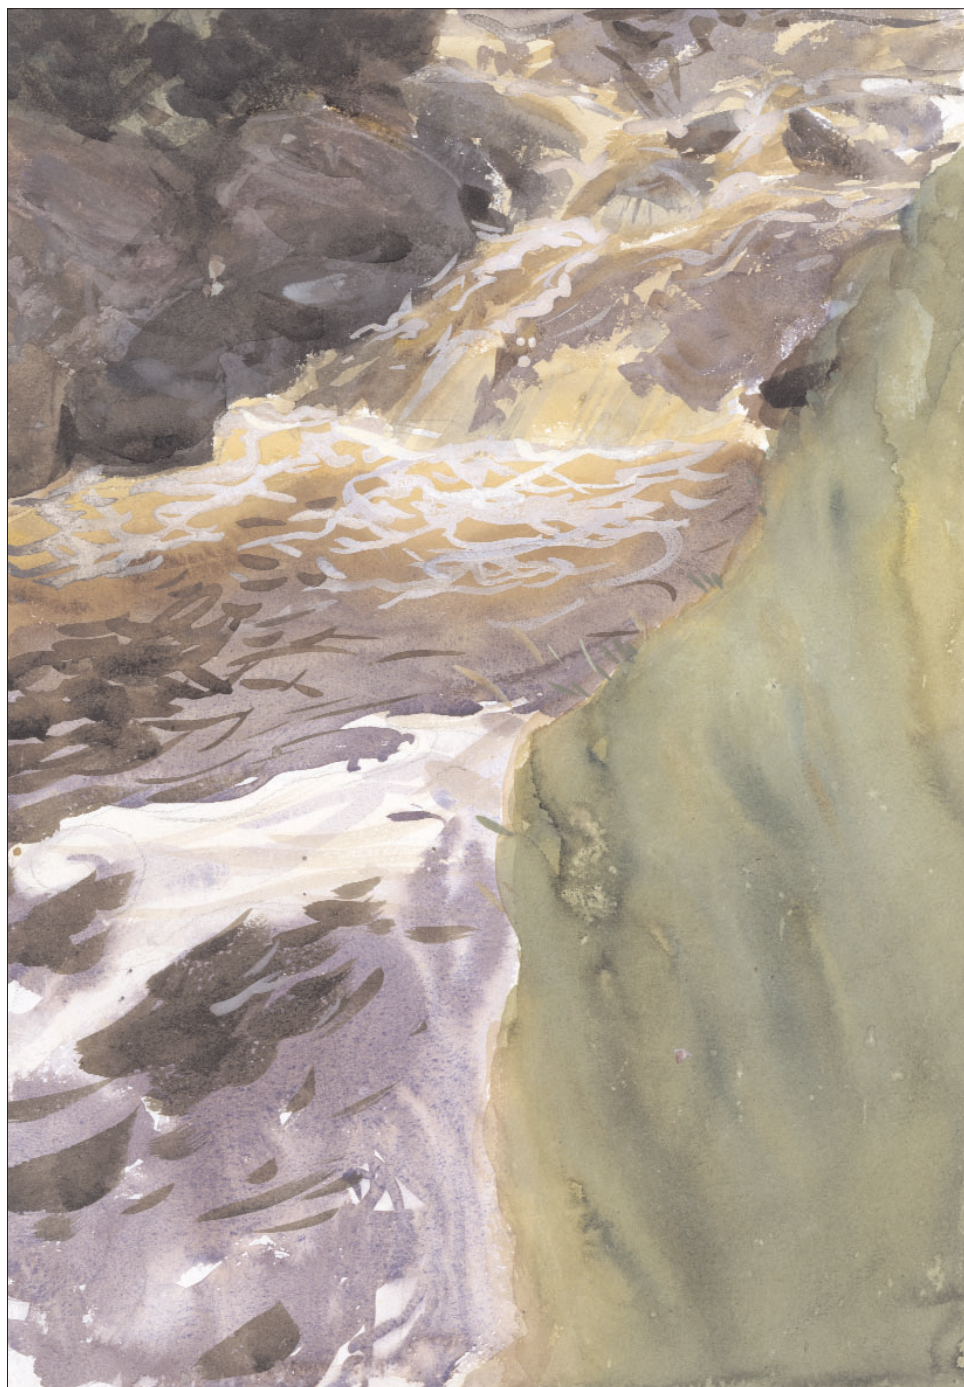

Source: http://ps.psychiatryonline.org/doi/suppl/10.1176/ps.2011.62.issue-12/suppl_file/cover.pdf
